# Supplementary material for: Seizures Triggered by Systemic Administration of 4-Aminopyridine Lead to Acute Brain Glucose Hypometabolism in Rats, as Assessed by PET Molecular Imaging
Source: Preprints.org preprint supplement (doi:10.20944/preprints202410.2027.v1), 2024-10-25
Supplement: Supplementary file 1 [file supplementary]

## Sheet: SUV
PET DATA
BASAL	EN SUV
	Peso (g)	Dosis (µCi)	Dosis (kBq)	Hippocampus	Cortex	Thalamus	Amygdala	Striatum	Hypothalamus	Cerebellum	Muscle
AP1	394	348	12876	4.00021	3.56424	4.63423	2.51479	4.57776	3.19237	2.86167	2.69164
AP2	381	368	13616	6.3599	5.72264	7.35434	4.37443	7.58052	5.12051	5.244	1.2603
AP3	414	350	12950	5.94792	5.32527	6.99342	4.45839	6.84138	5.31199	5.05217	1.46536
AP4	350	346	12802	5.43809	4.64174	6.33965	3.78442	6.04623	4.70292	4.50397	1.50604
AP5	398	358	13246	5.04738	4.27924	5.62073	3.69301	5.62689	4.45357	4.04271	1.46759
AP6	375	346	12802	5.1938	4.71658	6.02982	3.4453	5.72138	4.1845	4.2234	1.27148
AP7	408.7	349	12913	3.70625	3.42559	4.09814	2.75646	3.97633	3.20614	2.86108	1.82495
AP8	XXXX	XXXX	XXXX	XXXX	XXXX	XXXX	XXXX	XXXX	XXXX	XXXX	XXXX
AP10	347	359	13283	2.97503	2.79215	3.38136	2.33304	3.58307	2.58034	2.59606	1.27953
AP15	358	361.6	13379.2	5.88707	5.36955	6.60225	4.63085	7.15459	5.28004	4.6814	1.03054
AP16	358	360	13320	5.81267	5.35486	6.48715	4.00421	6.73243	4.63237	4.24767	1.15678
AP19	340	360.2	13327.4	3.17656	3.09328	3.35603	2.49402	3.54762	2.66107	2.50336	1.01076
AP20	326	351.2	12994.4	3.3346	2.72391	3.63791	2.59105	3.60735	2.91344	3.004	1.28048
	--------------	--------------	--------------	--------------	--------------	--------------	--------------	--------------	--------------	--------------	--------------
Media	370.808	354.75	13125.8	4.73996	4.25075	5.37792	3.42333	5.4163	4.01994	3.81846	1.43712
Des. Estánd.	28.5798	7.23181	267.577	1.22429	1.09184	1.47547	0.852283	1.50467	1.04515	0.994823	0.453718
SEM	8.25028	2.08764	77.2428	0.353423	0.315186	0.425932	0.246033	0.434362	0.301708	0.287181	0.130977
4-AP (5mg/kg)	EN SUV
	Peso (g)	Dosis (µCi)	Dosis (kBq)	Hippocampus	Cortex	Thalamus	Amygdala	Striatum	Hypothalamus	Cerebellum	Muscle
AP1	416.6	349	12913	2.54318	2.17102	2.96374	1.7679	2.74317	2.20403	2.77116	2.07714
AP2	396	350	12950	3.15526	2.93527	3.5104	2.09908	3.56787	2.42079	2.95656	1.51642
AP3	441	347	12839	4.10691	3.4145	4.89039	2.9267	4.71787	3.95766	4.59267	1.55782
AP4	366	340	12580	3.37097	3.10187	3.74328	2.03821	3.70984	2.68911	3.38106	1.44131
AP5	423	349	12913	2.73808	2.34717	2.94319	1.94196	2.89544	2.21126	2.61145	1.70941
AP6	400	346	12802	3.21448	2.9437	3.45827	2.43086	3.43543	2.57391	2.74315	1.52257
AP7	396	358	13246	2.39207	2.22582	2.57492	1.74073	2.66306	1.96103	2.38412	1.43331
AP8	416	351	12987	2.67792	2.39303	2.92298	1.93113	2.90238	2.2816	2.6177	2.18875
AP10	487	351.1	12990.7	3.67992	3.33516	3.98741	2.71903	4.23059	3.05116	3.0394	2.4936
AP15	466	352	13024	4.9742	4.45366	5.53699	3.59564	5.73654	4.07549	4.1174	1.44528
AP16	467	350	12950	4.84946	4.12196	5.41184	3.47909	5.29296	4.02114	4.2111	2.43225
AP19	340	360.2	13327.4	3.25355	2.91886	3.58509	2.39219	3.56285	2.88962	2.9392	1.79838
AP20	413.5	360.6	13342.2	4.11936	3.36496	4.49406	3.20083	4.45631	3.59909	3.71096	1.4655
	--------------	--------------	--------------	--------------	--------------	--------------	--------------	--------------	--------------	--------------	--------------
Media	417.546	351.069	12989.6	3.46734	3.05592	3.84789	2.4818	3.83956	2.91815	3.23661	1.77552
Des. Estánd.	40.9507	5.76446	213.285	0.838743	0.698455	0.968015	0.646388	0.987507	0.75653	0.705735	0.39009
SEM	11.3577	1.59877	59.1546	0.232625	0.193717	0.268479	0.179276	0.273885	0.209824	0.195736	0.108192
PORCENTAJE VARIACIÓN
				Hippocampus	Cortex	Thalamus	Amygdala	Striatum	Hypothalamus	Cerebellum	Muscle
			%	73.1512	71.8913	71.5497	72.4965	70.8891	72.5918	84.7622	123.547
			%VARIAC.	26.8488	28.1087	28.4503	27.5035	29.1109	27.4082	15.2378	-23.5468
